# Supplementary material
Source: publisher figshare collection journal article supplement (https://asha.figshare.com/articles/dataset/_/28225199)
Supplement: Supplementary file 2 [file 1]

Correlations among the pupil measures

**Supplemental Material S1.** Overview of the correlations between pupil measures. Note that a statistical validation of the correlations was not performed. This was motivated by the fact that all available information (and not separate measures) was used to train, optimize, and test the classifier.

|          | PPD | MPD | RPC1 | RPC2 | RPC3 | Baseline |
|----------|-----|-----|------|------|------|----------|
| PPD      | —   | .91 | .42  | .87  | .87  | -.17     |
| MPD      |     | —   | .38  | .78  | .99  | -.14     |
| RPC1     |     |     | —    | .56  | .69  | -.01     |
| RPC2     |     |     |      | —    | .69  | .04      |
| RPC3     |     |     |      |      | —    | -.17     |
| Baseline |     |     |      |      |      | —        |
