# Supplementary material
Source: publisher figshare collection journal article supplement (https://asha.figshare.com/articles/dataset/_/28225199)
Supplement: Supplementary file 3 [file 1]

## Descriptive statistics of the pupil measures

**Supplemental Material S2.** Descriptive statistics of pupil measures used for each of the classification models. *M* = mean; *SD* = standard deviation; *R* = Range.

| Classification model     |          | Binary outcome                     |                                   |
|--------------------------|----------|------------------------------------|-----------------------------------|
|                          |          | Normal hearing                     | Hearing-impaired                  |
| <b>All</b>               | MPD (mm) | M 0.08, SD 0.30, R <-1.26, 1.62>   | M 0.04, SD 0.23, R <-1.16, 0.96>  |
|                          | PPD (mm) | M 0.27, SD 0.31, R <-0.81, 1.74>   | M 0.19, SD 0.22, R <-0.7, 1.06>   |
|                          | RPC1     | M 0.92, SD 1.73, R <-7.71, 8.47>   | M 0.91, SD 1.32, R <-5.9, 6.18>   |
|                          | RPC2     | M 1.97, SD 2.65, R <-7.69, 12.85>  | M 1.08, SD 1.80, R <-8.24, 8.10>  |
|                          | RPC3     | M 0.47, SD 2.74, R <-12.56, 14.36> | M 0.24, SD 2.10, R <-11.35, 8.47> |
|                          | BPS (mm) | M 3.85, SD 0.68, R <2.35, 5.65>    | M 3.66, SD 0.51, R <2.41, 5.46>   |
| <b>Correct</b>           | MPD (mm) | M 0.09, SD 0.31, R <-1.13, 1.62>   | M 0.01, SD 0.22, R <-0.89, 0.94>  |
|                          | PPD (mm) | M 0.27, SD 0.32, R <-0.81, 1.74>   | M 0.15, SD 0.21, R <-0.7, 1.03>   |
|                          | RPC1     | M 0.90, SD 1.75, R <-7.71, 8.47>   | M 0.85, SD 1.36, R <-5.9, 6.18>   |
|                          | RPC2     | M 1.91, SD 2.70, R <-6.68, 12.85>  | M 0.88, SD 1.78, R <-8.24, 7.33>  |
|                          | RPC3     | M 0.51, SD 2.83, R <-11.18, 14.36> | M -0.06, SD 2.04, R <-8.5, 8.47>  |
|                          | BPS (mm) | M 3.83, SD 0.69, R <2.37, 5.65>    | M 3.64, SD 0.50, R <2.41, 5.28>   |
| <b><sup>c</sup>SNR-7</b> | MPD (mm) | M 0.09, SD 0.31, R <-0.92, 1.62>   | M 0.07, SD 0.22, R <-0.45, 0.67>  |
|                          | PPD (mm) | M 0.27, SD 0.33, R <-0.57, 1.74>   | M 0.21, SD 0.23, R <-0.28, 0.88>  |
|                          | RPC1     | M 0.63, SD 1.53, R <-3.51, 6.33>   | M 0.64, SD 1.61, R <-5.27, 4.71>  |
|                          | RPC2     | M 1.81, SD 2.64, R <-4.75, 12.59>  | M 0.85, SD 1.88, R <-6, 6.04>     |
|                          | RPC3     | M 0.57, SD 2.76, R <-8.93, 14.36>  | M 0.57, SD 2.03, R <-4.51, 6.40>  |
|                          | BPS (mm) | M 3.87, SD 0.63, R <2.63, 5.65>    | M 3.53, SD 0.41, R <2.61, 4.55>   |
| <b><sup>c</sup>SNR-5</b> | MPD (mm) | M 0.03, SD 0.26, R <-0.59, 0.94>   | M 0.06, SD 0.19, R <-0.42, 0.56>  |
|                          | PPD (mm) | M 0.20, SD 0.25, R <-0.41, 1.31>   | M 0.20, SD 0.20, R <-0.25, 0.75>  |
|                          | RPC1     | M 0.95, SD 1.52, R <-3.39, 6.74>   | M 0.87, SD 1.34, R <-4.13, 6.18>  |
|                          | RPC2     | M 1.43, SD 2.08, R <-4.79, 6.89>   | M 1.06, SD 1.53, R <-2.89, 6.67>  |
|                          | RPC3     | M 0.06, SD 2.42, R <-6.69, 8.79>   | M 0.41, SD 1.78, R <-4.93, 5.51>  |
|                          | BPS (mm) | M 3.94, SD 0.74, R <2.64, 5.53>    | M 3.65, SD 0.49, R <2.74, 4.97>   |
| <b><sup>c</sup>SNR-3</b> | MPD (mm) | M 0.02, SD 0.31, R <-1.13, 0.98>   | M 0.05, SD 0.25, R <-0.63, 0.94>  |
|                          | PPD (mm) | M 0.18, SD 0.31, R <-0.81, 1.28>   | M 0.19, SD 0.24, R <-0.53, 1.03>  |
|                          | RPC1     | M 0.47, SD 1.94, R <-7.71, 8.47>   | M 1.11, SD 1.63, R <-5.55, 5.45>  |
|                          | RPC2     | M 0.85, SD 2.46, R <-6.52, 9.81>   | M 1.21, SD 2.06, R <-5.04, 7.33>  |
|                          | RPC3     | M 0.05, SD 2.89, R <-10.88, 9.30>  | M 0.29, SD 2.33, R <-5.43, 8.47>  |
|                          | BPS (mm) | M 3.70, SD 0.73, R <2.54, 5.42>    | M 3.70, SD 0.55, R <2.41, 4.72>   |
|                          |          | Correct trial                      | Incorrect trial                   |
| <b>NH TR</b>             | MPD (mm) | M 0.12, SD 0.32, R <-0.75, 1.22>   | M 0.07, SD 0.06, R <-0.97, 0.94>  |
|                          | PPD (mm) | M 0.33, SD 0.31, R <-0.46, 1.32>   | M 0.28, SD 0.31, R <-0.41, 1.14>  |
|                          | RPC1     | M 0.92, SD 1.94, R <-6.18, 6.30>   | M 1.17, SD 1.77, R <-6.8, 6.09>   |
|                          | RPC2     | M 2.53, SD 2.66, R <-6.68, 10.38>  | M 2.17, SD 2.65, R <-4.20, 9.83>  |
|                          | RPC3     | M 0.69, SD 2.94, R <-8.45, 10.73>  | M 0.28, SD 2.84, R <-10.35, 8.03> |
|                          | BPS (mm) | M 4.07, SD 0.70, R <2.59, 5.29>    | M 3.98, SD 0.66, R <2.61, 5.51>   |
| <b>HI TR</b>             | MPD (mm) | M 0.06, SD 0.20, R <-0.42, 0.67>   | M 0.14, SD 0.21, R <-0.42, 0.72>  |
|                          | PPD (mm) | M 0.20, SD 0.21, R <-0.24, 0.88>   | M 0.30, SD 0.20, R <-0.22, 0.85>  |
|                          | RPC1     | M 0.76, SD 1.54, R <-5.27, 5.30>   | M 1.07, SD 1.23, R <-4.38, 3.80>  |
|                          | RPC2     | M 0.90, SD 1.76, R <-6.00, 6.67>   | M 1.75, SD 1.59, R <-3.53, 5.64>  |
|                          | RPC3     | M 0.41, SD 1.92, R <-4.93, 6.40>   | M 1.04, SD 2.02, R <-4.69, 6.69>  |
|                          | BPS (mm) | M 3.60, SD 0.47, R <2.61, 4.97>    | M 3.74, SD 0.60, R <2.73, 5.46>   |

|               |          | Low SNR                           | High SNR                          |
|---------------|----------|-----------------------------------|-----------------------------------|
| <b>NH SNR</b> | MPD (mm) | M 0.12, SD 0.32, R <-0.75, 1.22>  | M 0.03, SD 0.26, R <-0.59, 0.94>  |
|               | PPD (mm) | M 0.33, SD 0.31, R <-0.46, 1.32>  | M 0.20, SD 0.25, R <-0.41, 1.31>  |
|               | RPC1     | M 0.92, SD 1.94, R <-6.18, 6.30>  | M 0.95, SD 1.52, R <-3.39, 6.74>  |
|               | RPC2     | M 2.53, SD 2.66, R <-6.68, 10.38> | M 1.43, SD 2.08, R <-4.79, 6.89>  |
|               | RPC3     | M 0.69, SD 2.94, R <-8.45, 10.73> | M 0.06, SD 2.42, R <-6.69, 8.79>  |
|               | BPS (mm) | M 4.07, SD 0.70, R <2.59, 5.29>   | M 3.94, SD 0.74, R <2.61, 5.53>   |
| <b>HI SNR</b> | MPD (mm) | M 0.06, SD 0.20, R <-0.42, 0.67>  | M 0.00, SD 0.22, R <-0.74, 0.53>  |
|               | PPD (mm) | M 0.20, SD 0.21, R <-0.24, 0.88>  | M 0.13, SD 0.20, R <-0.43, 0.82>  |
|               | RPC1     | M 0.76, SD 1.54, R <-5.27, 5.30>  | M 0.71, SD 1.29, R <-5.12, 4.07>  |
|               | RPC2     | M 0.90, SD 1.76, R <-6.00, 6.67>  | M 0.81, SD 1.64, R <-4.02, 6.20>  |
|               | RPC3     | M 0.41, SD 1.92, R <-4.93, 6.40>  | M -0.17, SD 2.02, R <-7.33, 4.78> |
|               | BPS (mm) | M 3.60, SD 0.47, R <2.61, 4.97>   | M 3.53, SD 0.49, R <2.54, 4.71>   |
