# Supplementary material
Source: publisher figshare collection journal article supplement (https://asha.figshare.com/articles/dataset/_/28225199)
Supplement: Supplementary file 4 [file 1]

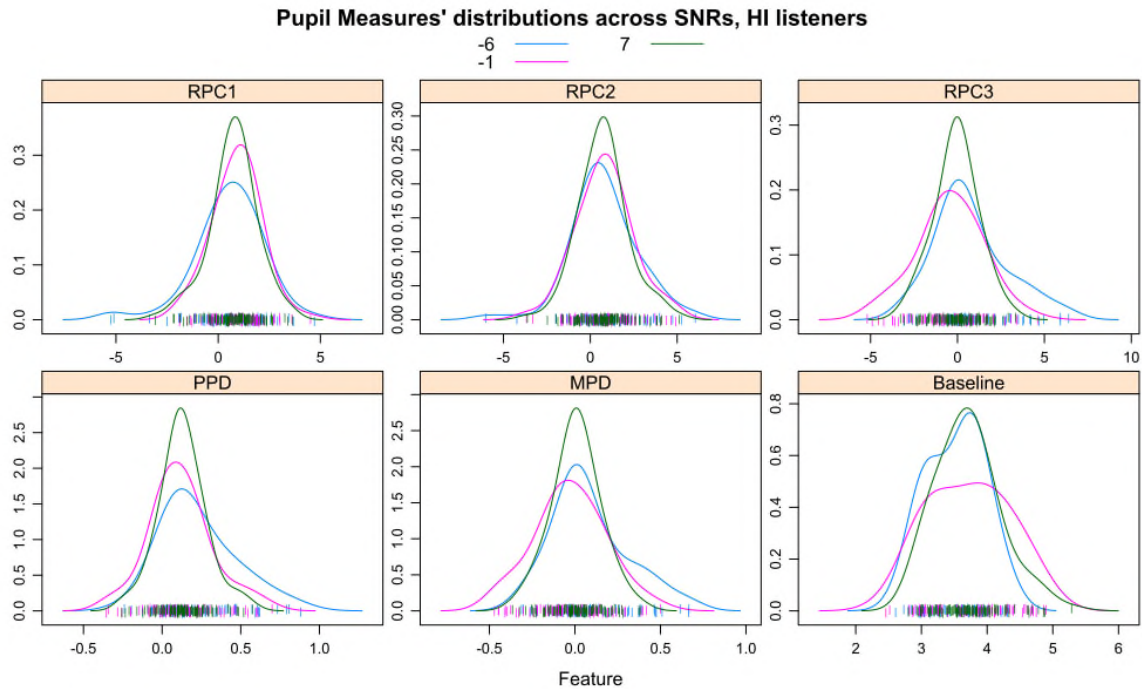

**Supplemental Material S4.** Distributions of pupil measures across three selected SNRs (+7 dB; -6 dB from the range of overlapping SNRs; -1 dB with the largest median misclassification percentage) within the HI group. Unlike in the NH group (Supplemental Material S3), pupil measures in the HI group were similarly distributed across SNRs.
